# Supplementary material for: Membranes for the Capture and Screening of Waterborne Plutonium Based on a Novel Pu-Extractive Copolymer Additive
Source: MDPI journal article supplement (doi:10.3390/membranes12010003), 2021-12-21
Supplement: s1 [file s1]

## SUPPLEMENTARY MATERIAL

# Membranes for the Capture and Screening of Waterborne Plutonium Based on a Novel Pu-Extractive Copolymer Additive

James C. Foster <sup>1,2</sup>, Timothy A. DeVol <sup>2,3</sup> and Scott M. Husson <sup>1,\*</sup>

<sup>1</sup> Department of Chemical and Biomolecular Engineering, Clemson University, 127 Earle Hall, Clemson, SC 29634, USA; jcf@clemson.edu

<sup>2</sup> Nuclear Environmental Engineering Sciences, Radioactive Waste Management Center, Clemson University, Clemson, SC 29625, USA; devol@clemson.edu

<sup>3</sup> Department of Environmental Engineering and Earth Sciences, Clemson University, 342 Computer Court, Anderson, SC 29625, USA

\* Correspondence: shusson@clemson.edu

## CONTENT

**Table S1:** Isotopic fractions of the stock 147 Bq/mL solution used in the study

**Table S2:** Ion content of the synthetic seawater used in the direct filtration <sup>238</sup>Pu uptake studies

**Table S3:** Treatments for each batch 10 wt.% PVDF-*g*-EGMP membrane tested in the permeability study

**Figure S1:** Flux data for each 10 wt.% PVDF-*g*-EGMP batch tested in permeability study

**Figure S2:** Alpha spectrum of the 5 Bq <sup>238</sup>Pu smear efficiency calibration sample

**Figure S3:** Alpha spectra of the 0.5 mL samples taken for the <sup>242</sup>Pu uptake study

**Figure S4:** Sessile drop contact angle measurements of 100% PVDF membranes

**Figure S5:** Sessile drop contact angle measurements of PVDF membranes casted with 10% PVDF-*g*-EGMP.

**Table S1:** Isotopic mass fractions of Pu isotopes present in the 147 Bq/mL <sup>242</sup>Pu stock solution.

| Isotope           | Mass Fraction [%] | Specific Activity [Ci/g] | Mode of Decay [-] | E $\alpha$ [keV]                  |
|-------------------|-------------------|--------------------------|-------------------|-----------------------------------|
| <sup>238</sup> Pu | 0.003             | 1.70E+01                 | alpha             | 5499 (71%), 5456 (29%)            |
| <sup>239</sup> Pu | 0.005             | 6.20E-02                 | alpha             | 5157 (71%), 5144(17%), 5106 (12%) |
| <sup>240</sup> Pu | 0.022             | 2.30E-01                 | alpha             | 5168 (73%), 5124 (27%)            |
| <sup>241</sup> Pu | 0.006             | 1.00E+02                 | beta              | ...                               |
| <sup>242</sup> Pu | 99.962            | 3.90E-03                 | alpha             | 4902 (77%), 4858 (23%)            |
| <sup>244</sup> Pu | 0.002             | 1.80E-05                 | alpha             | 4589 (81%), 4546 (19%)            |

**Table S2:** Ion content of the Instant Ocean aquarium salt used to prepare Pu-bearing solutions for the synthetic seawater trials.

|               | Instant Ocean [ppm] | Typical Seawater [ppm] |  |            | Instant Ocean [ppm] | Typical Seawater [ppm] |
|---------------|---------------------|------------------------|--|------------|---------------------|------------------------|
| <i>Ion</i>    |                     |                        |  | <i>Ion</i> |                     |                        |
| Chloride      | 19290               | 19353                  |  | Chromium   | <0.015              | <0.01                  |
| Sodium        | 10780               | 10781                  |  | Cobalt     | <0.015              | <0.01                  |
| Sulfate       | 2660                | 2712                   |  | Copper     | <0.015              | <0.01                  |
| Magnesium     | 1320                | 1284                   |  | Nickel     | <0.015              | <0.01                  |
| Calcium       | 400                 | 523                    |  | Selenium   | <0.015              | <0.01                  |
| (Bi)Carbonate | 200                 | 126                    |  | Vanadium   | <0.015              | <0.02                  |
| Bromide       | 56                  | 67                     |  | Zinc       | <0.015              | <0.01                  |
| Strontium     | 8.8                 | 7.9                    |  | Molybdenum | <0.01               | 0.01                   |
| Boron         | 5.6                 | 4.5                    |  | Aluminum   | <0.006              | <0.001                 |
| Fluoride      | 1                   | 1.28                   |  | Lead       | <0.005              | <0.001                 |
| Lithium       | 0.3                 | 0.173                  |  | Arsenic    | <0.004              | 0.002                  |
| Iodide        | 0.24                | 0.06                   |  | Cadmium    | <0.002              | <0.001                 |
| Barium        | <0.04               | <0.014                 |  | Nitrate    | 0                   | 1.8                    |
| Iron          | <0.04               | <0.001                 |  | Phosphate  | 0                   | 0.2                    |
| Manganese     | <0.025              | <0.001                 |  |            |                     |                        |

**Table S3:** Tabulated list of treatments for each 10 wt.% PVDF-g-EGMP membrane batch used in the permeability study.

| <i>Sample ID:</i> | <b>Vacuum treatment</b> | <b>Percent Glycerol</b> | <b>Casting Time</b> |
|-------------------|-------------------------|-------------------------|---------------------|
| <b>#1</b>         | Yes                     | 0 wt.%                  | 5 s                 |
| <b>#2</b>         | No                      | 0 wt.%                  | 5 s                 |
| <b>#3</b>         | Yes                     | 2 wt.%                  | 5 s                 |
| <b>#4</b>         | No                      | 2 wt.%                  | 5 s                 |
| <b>#5</b>         | Yes                     | 0 wt.%                  | 30 s                |
| <b>#6</b>         | No                      | 0 wt.%                  | 30 s                |
| <b>#7</b>         | Yes                     | 2 wt.%                  | 30 s                |
| <b>#8</b>         | No                      | 2 wt.%                  | 30 s                |

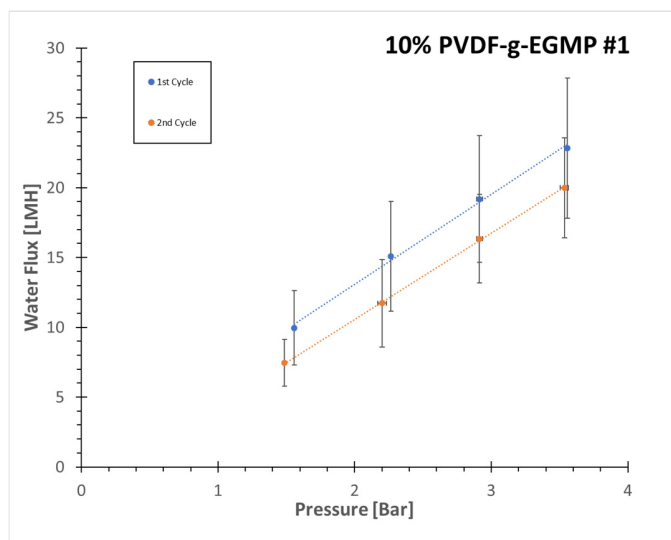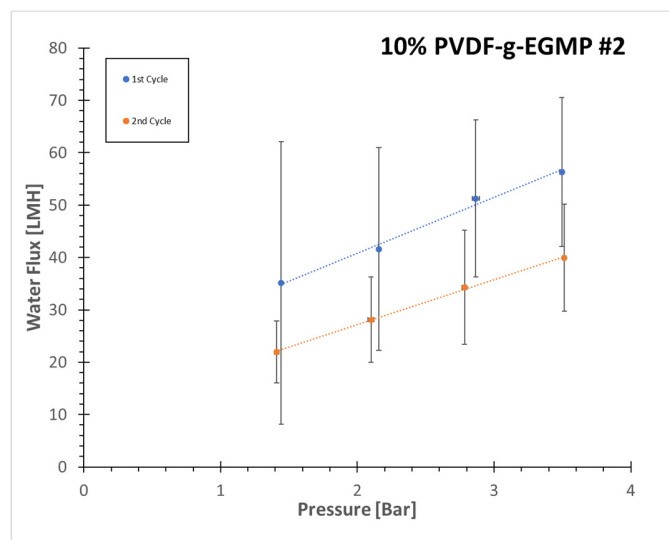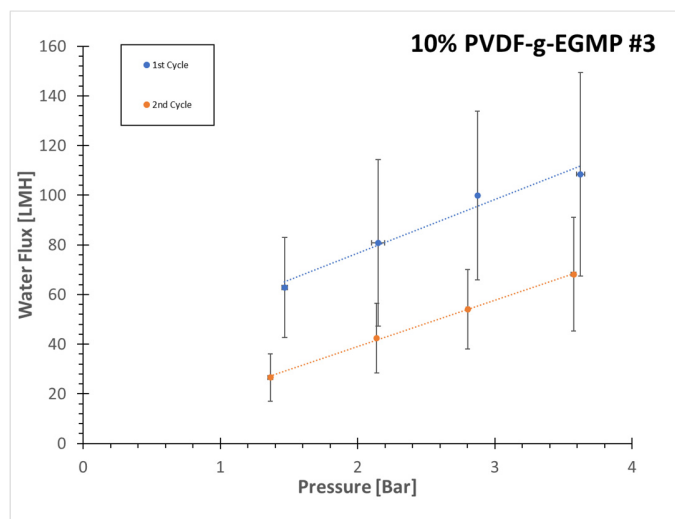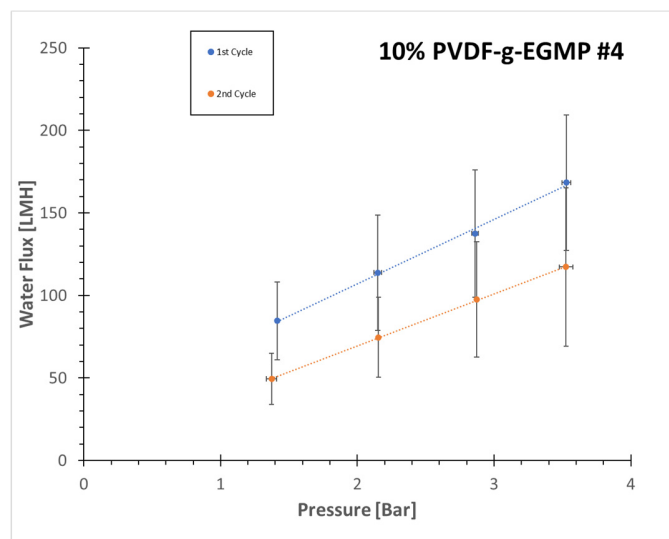

**Figure S1:** Resulting water flux data of the 10 wt.% PVDF-g-EGMP membranes from the permeability study.

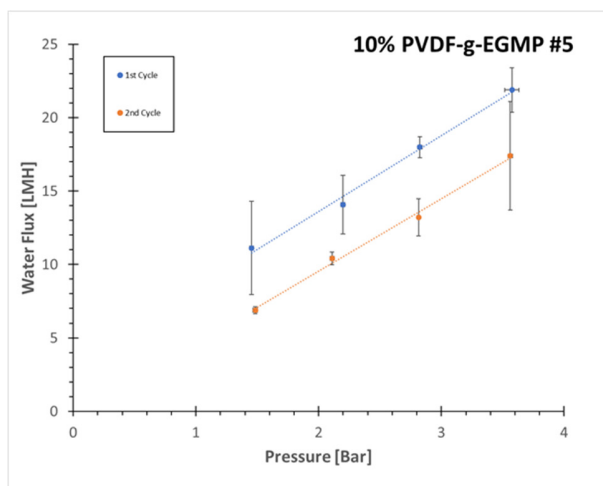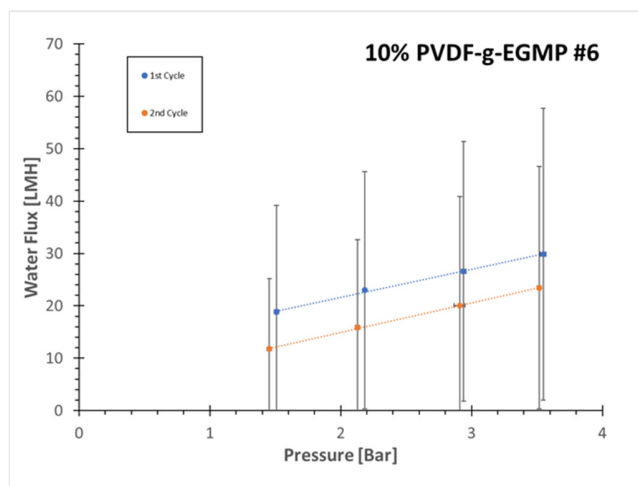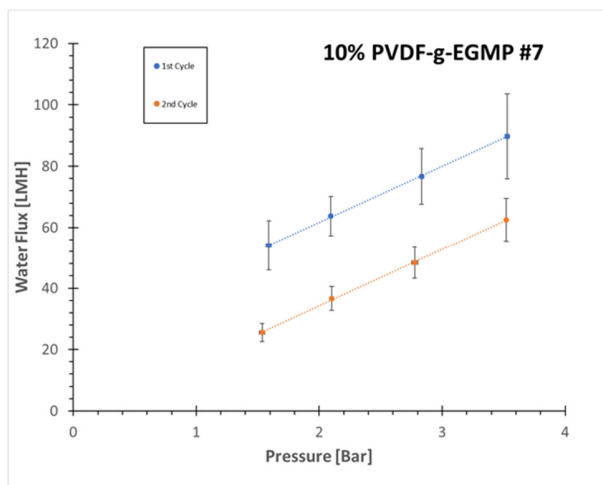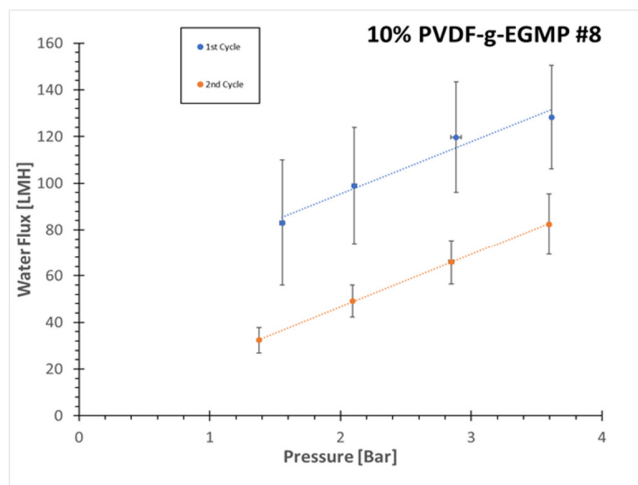

**Figure S1 (Cont.):** Resulting water flux data of the 10 wt.% PVDF-g-EGMP membranes from the permeability study.

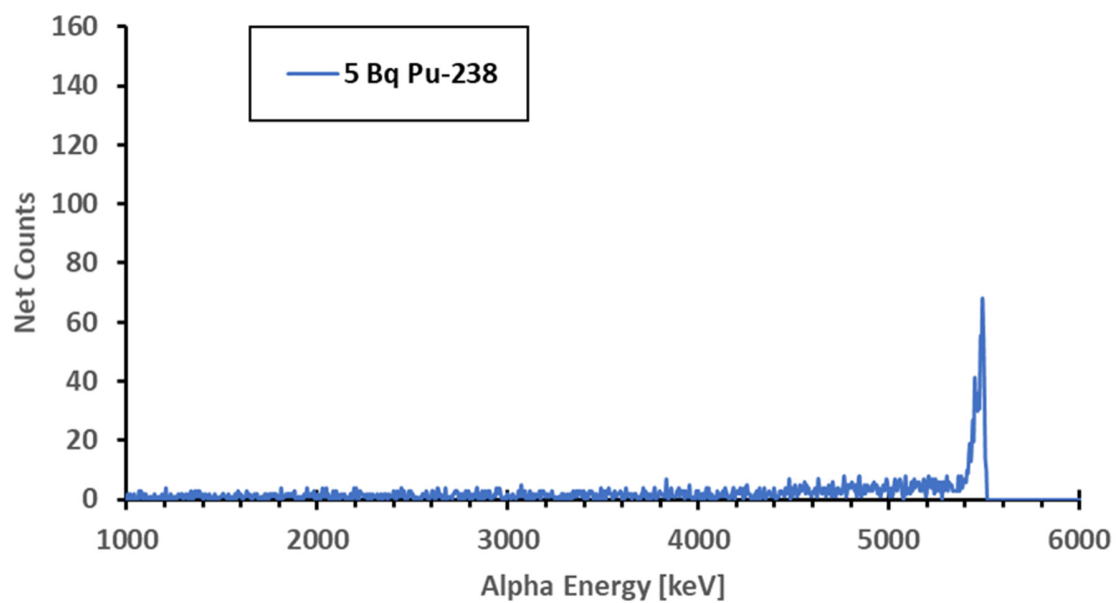

**Figure S2:** Alpha spectra of 5 Bq  $^{238}\text{Pu}$  smeared over a 45 mm diameter PVDF membrane. The sample was dried and placed 5 mm from a 25 mm diameter PIPS detector and counted for 90 min, resulting in an absolute efficiency of 3.65% for the sample geometry.

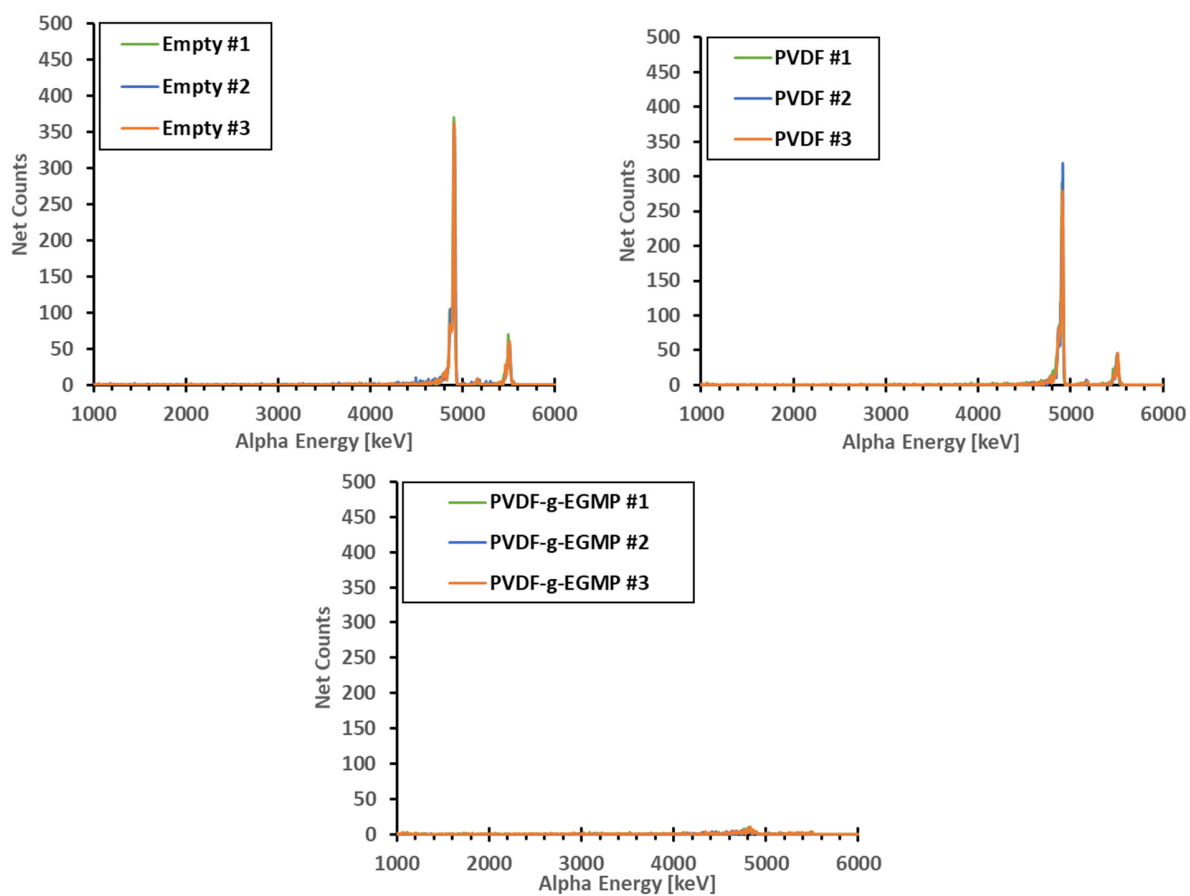

**Figure S3:** Resulting 5 h alpha spectra of the 0.5 mL  $^{242}\text{Pu}$  solution samples collected after 24 h exposure to the (1) empty centrifuge vials; (2) 100 mg of PVDF resin; (3) 100 mg of PVDF-g-EGMP.

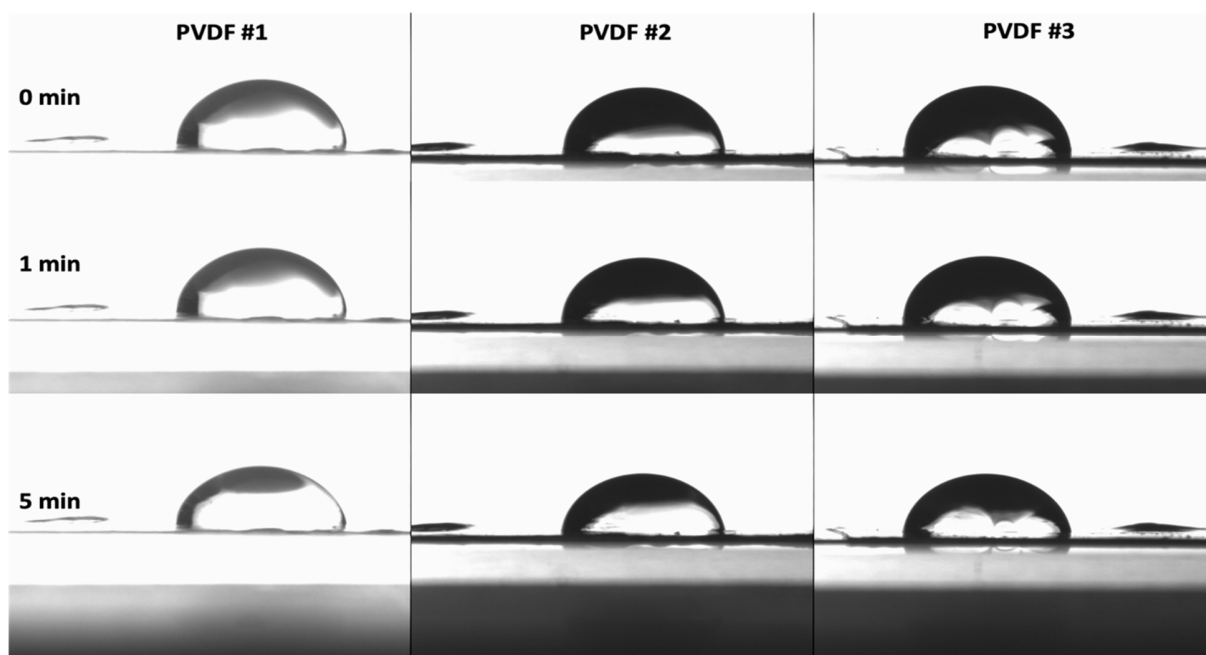

**Figure S4:** Contact angle measurements of 100% PVDF membranes using a 25 $\mu$ L droplet of DI water on the surface. Theta angle measurements ( $\Theta$ ) were measured at 0, 1, and 5 min intervals on three separate positions of the membrane.

| Sample<br>[-] | Time<br>[min]     | $\Theta$<br>[degree]   |
|---------------|-------------------|------------------------|
| 100% PVDF 1   | 0                 | 88.6                   |
| ...           | 1                 | 88.6                   |
| ...           | 5                 | 85.3                   |
| 100% PVDF 2   | 0                 | 90.8                   |
| ...           | 1                 | 90.3                   |
| ...           | 5                 | 86.1                   |
| 100% PVDF 3   | 0                 | 91.7                   |
| ...           | 1                 | 90.3                   |
| ...           | 5                 | 85.5                   |
| Time          | Mean ( $\Theta$ ) | Std. Dev. ( $\Theta$ ) |
| 0 min         | 90.4              | 1.59                   |
| 1 min         | 89.7              | 0.98                   |
| 5 min         | 85.6              | 0.42                   |



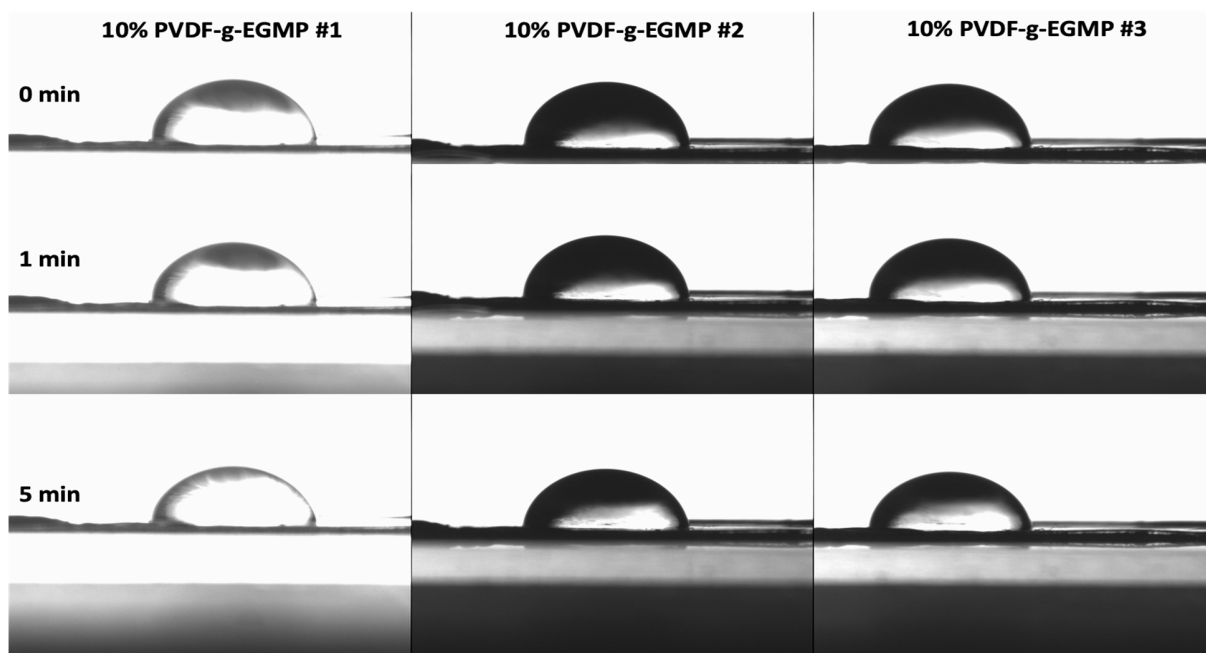

**Figure S5:** Contact angle measurements of PVDF membranes containing 10 wt.% PVDF-g-EGMP using a 25 $\mu$ L droplet of DI water on the surface. Theta angle measurements ( $\Theta$ ) were measured at 0, 1, and 5 min intervals on three separate positions of the membrane.

| Sample<br>[-] | Time<br>[min]     | $\Theta$<br>[degree]   |
|---------------|-------------------|------------------------|
| 100% PVDF 1   | 0                 | 85.6                   |
| ...           | 1                 | 85.1                   |
| ...           | 5                 | 81.8                   |
| 100% PVDF 2   | 0                 | 85.5                   |
| ...           | 1                 | 84.5                   |
| ...           | 5                 | 80.4                   |
| 100% PVDF 3   | 0                 | 84.6                   |
| ...           | 1                 | 83.7                   |
| ...           | 5                 | 79.6                   |
| Time          | Mean ( $\Theta$ ) | Std. Dev. ( $\Theta$ ) |
| 0 min         | 85.2              | 0.55                   |
| 1 min         | 84.4              | 0.70                   |
| 5 min         | 80.6              | 1.11                   |
